# Supplementary material for: Health-related quality of life and glycaemic control among adults with type 1 and type 2 diabetes – a nationwide cross-sectional study
Source: PubMed Central journal article supplement (PMC6694672; doi:10.1186/s12955-019-1212-z), 2019-08-14
Supplement: 12955_2019_1212_MOESM1_ESM.pdf [file 12955_2019_1212_MOESM1_ESM.pdf]

## Additional file 1

**Table S1.** Clinical and demographic characteristics for non-responders separated for type 1 and type 2 diabetes

| <b>Variable</b>                    | <b>Non-responders type 1 diabetes</b><br>(n=1106) | <b>Non-responders type 2 diabetes</b><br>(n=1116) |
|------------------------------------|---------------------------------------------------|---------------------------------------------------|
| Men, %                             | 60.7                                              | 58.1                                              |
| Age, years (SD)                    | 41.2 (15.5)                                       | 62.8 (10.9)                                       |
| Diabetes duration, years (SD)      | 21.7 (14.0)                                       | 8.7 (7.0)                                         |
| HbA1c, mmol/mol (SD)               | 65.2 (15.1)                                       | 54.7 (14.3)                                       |
| HbA1c, % (SD)                      | 8.1 (1.4)                                         | 7.2 (1.3)                                         |
| BMI, kg/m <sup>2</sup> (SD)        | 26.1 (4.6)                                        | 30.9 (5.9)                                        |
| Systolic blood pressure, mmHg (SD) | 126.1 (14.0)                                      | 134.7 (15.8)                                      |
| Antihypertensive medication, %     | 34.6                                              | 77.5                                              |
| LDL-cholesterol, mmol/L (SD)       | 2.53 (0.79)                                       | 2.64 (0.93)                                       |
| Lipid-lowering medication, %       | 37.1                                              | 60.5                                              |
| Microalbuminuria, %                | 11.4                                              | 18.4                                              |
| Macro albuminuria, %               | 5.6                                               | 5.0                                               |
| Retinopathy, %                     | 66.2                                              | 30.5                                              |
| Smoker, %                          | 15.7                                              | 18.4                                              |
| Physical activity, daily, %        | 20.3                                              | 27.1                                              |
| <b>Diabetes treatment</b>          |                                                   |                                                   |
| Diet alone, %                      | -                                                 | 20.1                                              |
| Oral hypoglycaemic agent alone, %  | -                                                 | 52.5                                              |
| Insulin alone, %                   | 97.2                                              | 8.1                                               |
| Insulin and oral agent, %          | 2.3                                               | 16.7                                              |
| Insulin pump users, %              | 19.9                                              | 0.0                                               |

**Table S2.** Least square mean estimates and 95% confidence intervals for SF-36v2 domains and summary measures in three glycated haemoglobin (HbA<sub>1c</sub>) groups for type 1 and type 2 diabetes

| SF-36v2 domain and summary measure | Type 1 diabetes                        |                                             |                                        |                                        |                                             |                                        | Type 2 diabetes                        |                                             |                                        |                                        |                                             |                                        |
|------------------------------------|----------------------------------------|---------------------------------------------|----------------------------------------|----------------------------------------|---------------------------------------------|----------------------------------------|----------------------------------------|---------------------------------------------|----------------------------------------|----------------------------------------|---------------------------------------------|----------------------------------------|
|                                    | Unadjusted analysis                    |                                             |                                        | Adjusted analysis                      |                                             |                                        | Unadjusted analysis                    |                                             |                                        | Adjusted analysis                      |                                             |                                        |
|                                    | HbA <sub>1c</sub> <52 mmol/mol (<6.9%) | HbA <sub>1c</sub> 52-69 mmol/mol (6.9-8.5%) | HbA <sub>1c</sub> ≥70 mmol/mol (≥8.6%) | HbA <sub>1c</sub> <52 mmol/mol (<6.9%) | HbA <sub>1c</sub> 52-69 mmol/mol (6.9-8.5%) | HbA <sub>1c</sub> ≥70 mmol/mol (≥8.6%) | HbA <sub>1c</sub> <52 mmol/mol (<6.9%) | HbA <sub>1c</sub> 52-69 mmol/mol (6.9-8.5%) | HbA <sub>1c</sub> ≥70 mmol/mol (≥8.6%) | HbA <sub>1c</sub> <52 mmol/mol (<6.9%) | HbA <sub>1c</sub> 52-69 mmol/mol (6.9-8.5%) | HbA <sub>1c</sub> ≥70 mmol/mol (≥8.6%) |
| PF                                 | 88.15<br>(87.37-88.93)                 | 84.68<br>(84.21-85.15)                      | 80.21<br>(79.45-80.96)                 | 71.79<br>(70.27-73.31)                 | 72.88<br>(71.50-74.26)                      | 69.04<br>(67.61-70.48)                 | 73.89<br>(73.27-74.51)                 | 68.58<br>(67.83-69.33)                      | 60.17<br>(58.69-61.66)                 | 61.53<br>(59.94-63.11)                 | 61.08<br>(59.50-62.66)                      | 55.77<br>(53.75-57.79)                 |
| RP                                 | 83.97<br>(83.00-84.94)                 | 80.77<br>(80.18-81.36)                      | 75.31<br>(74.37-76.25)                 | 66.69<br>(64.57-68.82)                 | 66.84<br>(64.92-68.76)                      | 62.56<br>(60.57-64.55)                 | 77.91<br>(77.24-78.58)                 | 70.88<br>(70.07-71.69)                      | 59.26<br>(57.63-60.89)                 | 66.66<br>(64.86-68.46)                 | 64.39<br>(62.60-66.17)                      | 55.46<br>(53.16-57.76)                 |
| BP                                 | 74.57<br>(73.54-75.59)                 | 69.37<br>(68.75-69.99)                      | 63.62<br>(62.63-64.61)                 | 63.68<br>(61.43-65.94)                 | 62.50<br>(60.46-64.54)                      | 58.47<br>(56.36-60.59)                 | 65.36<br>(64.70-66.03)                 | 60.14<br>(59.35-60.94)                      | 55.24<br>(53.63-56.84)                 | 57.96<br>(56.18-59.74)                 | 57.73<br>(55.97-59.49)                      | 56.28<br>(54.00-58.57)                 |
| GH                                 | 65.45<br>(64.59-66.31)                 | 61.36<br>(60.84-61.88)                      | 52.73<br>(51.91-53.56)                 | 47.87<br>(45.99-49.74)                 | 47.28<br>(45.58-48.98)                      | 40.78<br>(39.01-42.54)                 | 63.24<br>(62.70-63.78)                 | 60.11<br>(59.46-60.75)                      | 49.39<br>(48.09-50.68)                 | 53.60<br>(52.17-55.02)                 | 54.77<br>(53.36-56.18)                      | 45.82<br>(43.99-47.66)                 |
| VT                                 | 57.91<br>(57.01-58.80)                 | 55.36<br>(54.82-55.90)                      | 48.75<br>(47.88-49.61)                 | 42.12<br>(40.17-44.06)                 | 41.80<br>(40.03-43.57)                      | 37.84<br>(36.00-39.67)                 | 60.84<br>(60.29-61.40)                 | 58.37<br>(57.71-59.04)                      | 48.63<br>(47.30-49.97)                 | 52.79<br>(51.31-54.28)                 | 54.39<br>(52.92-55.86)                      | 45.48<br>(43.57-47.39)                 |
| SF                                 | 84.49<br>(83.61-85.36)                 | 81.44<br>(80.91-81.96)                      | 77.81<br>(76.96-78.65)                 | 72.74<br>(70.77-74.70)                 | 71.69<br>(69.91-73.46)                      | 69.76<br>(67.91-71.60)                 | 82.94<br>(82.37-83.51)                 | 80.28<br>(79.59-80.96)                      | 72.00<br>(70.62-73.39)                 | 75.46<br>(73.92-77.00)                 | 76.80<br>(75.27-78.32)                      | 70.02<br>(68.04-72.00)                 |
| RE                                 | 86.05<br>(85.16-86.94)                 | 83.37<br>(82.83-83.90)                      | 80.27<br>(79.41-81.13)                 | 73.42<br>(71.43-75.40)                 | 71.28<br>(69.48-73.08)                      | 69.48<br>(67.61-71.34)                 | 81.43<br>(80.78-82.08)                 | 78.69<br>(77.91-79.47)                      | 68.01<br>(66.43-69.59)                 | 70.59<br>(68.84-72.34)                 | 72.28<br>(70.54-74.02)                      | 65.96<br>(63.73-68.20)                 |
| MH                                 | 74.42<br>(73.68-75.15)                 | 73.00<br>(72.55-73.44)                      | 70.43<br>(69.71-71.14)                 | 64.66<br>(63.05-66.27)                 | 64.25<br>(62.79-65.71)                      | 62.97<br>(61.46-64.49)                 | 75.36<br>(74.86-75.86)                 | 75.72<br>(75.12-76.32)                      | 65.10<br>(63.89-66.32)                 | 66.87<br>(65.51-68.22)                 | 70.21<br>(68.87-71.56)                      | 61.97<br>(60.22-63.72)                 |
| PCS                                | 49.77<br>(49.36-50.18)                 | 48.98<br>(48.73-49.23)                      | 47.58<br>(47.18-47.97)                 | 45.07<br>(44.16-45.97)                 | 44.31<br>(43.49-45.14)                      | 43.78<br>(42.92-44.63)                 | 51.21<br>(50.96-51.47)                 | 51.33<br>(51.02-51.64)                      | 46.00<br>(45.37-46.63)                 | 47.47<br>(46.77-48.17)                 | 49.09<br>(48.40-49.78)                      | 45.01<br>(44.11-45.90)                 |
| MCS                                | 52.24<br>(51.89-52.58)                 | 50.45<br>(50.24-50.66)                      | 47.74<br>(47.41-48.08)                 | 45.60<br>(44.89-46.31)                 | 45.81<br>(45.16-46.45)                      | 43.51<br>(42.84-44.18)                 | 48.04<br>(47.81-48.27)                 | 45.23<br>(44.95-45.50)                      | 42.69<br>(42.13-43.25)                 | 44.30<br>(43.71-44.90)                 | 43.30<br>(42.71-43.90)                      | 41.24<br>(40.49-42.00)                 |

PF: physical functioning; RP: role-physical; BP: bodily pain; GH: general health; VT: vitality; SF: social functioning; RE: role-emotional; MH: mental health; PCS: physical component summary measure; MCS: mental component summary measure.
